# 1 **Estimating effects of parents' cognitive and non-cognitive** 2 **skills on offspring education using polygenic scores**

3 Perline A. Demange<sup>1,2,3\*</sup>, Jouke Jan Hottenga<sup>1</sup>, Abdel Abdellaoui<sup>4</sup>, Espen Moen Eilertsen<sup>10</sup>,  
4 Margherita Malanchini<sup>5,6</sup>, Benjamin W. Domingue<sup>7,8</sup>, Eveline L. de Zeeuw<sup>1,3</sup>, Kaili Rimfeld<sup>6</sup>,  
5 Thalia C. Eley<sup>6,9</sup>, Dorret I. Boomsma<sup>1</sup>, Elsje van Bergen<sup>1,3</sup>, Gerome Breen<sup>6,9</sup>, Michel G. Nivard<sup>1</sup>,  
6 Rosa Cheesman<sup>10,6\*</sup>

7 <sup>1</sup>Department of Biological Psychology, Vrije Universiteit Amsterdam, The Netherlands

8 <sup>2</sup>Amsterdam Public Health Research Institute, Amsterdam University Medical Centers, Amsterdam, The  
9 Netherlands

10 <sup>3</sup>Research Institute LEARN!, Vrije Universiteit Amsterdam, The Netherlands

11 <sup>4</sup>Department of Psychiatry, Amsterdam UMC, University of Amsterdam, Amsterdam, the Netherlands

12 <sup>5</sup>Department of Biological and Experimental Psychology, School of Biological and Chemical Sciences,  
13 Queen Mary University of London, UK

14 <sup>6</sup>Social, Genetic & Developmental Psychiatry Centre, Institute of Psychiatry, Psychology &  
15 Neuroscience, King's College London, UK

16 <sup>7</sup>Graduate School of Education, Stanford University, USA

17 <sup>8</sup>Center for Population Health Sciences, Stanford University, USA

18 <sup>9</sup>NIHR Maudsley Biomedical Research Centre; South London and Maudsley NHS Trust, UK

19 <sup>10</sup>PROMENTA Research Center, Department of Psychology, University of Oslo, Norway

20 \* corresponding authors

21 Contact: [r.c.cheesman@psykologi.uio.no](mailto:r.c.cheesman@psykologi.uio.no); [p.a.d.demange@vu.nl](mailto:p.a.d.demange@vu.nl)

## 22 **Abstract**

23 Understanding how parents' cognitive and non-cognitive skills influence offspring education is  
24 vital for educational, family and economic policy. We use genetics (GWAS-by-subtraction) to  
25 assess a latent, broad non-cognitive skills dimension. To index parental effects controlling for  
26 genetic transmission, we estimate indirect parental genetic effects of polygenic scores on  
27 childhood and adulthood educational outcomes, using siblings (N=47,459), adoptees (N=6,407),  
28 and parent-offspring trios (N=2,534) in three UK and Dutch cohorts. We find that parental  
29 cognitive and non-cognitive skills affect offspring education through their environment: on  
30 average across cohorts and designs, indirect genetic effects explain 36-40% of population  
31 polygenic score associations. However, indirect genetic effects are lower for achievement in the  
32 Dutch cohort, and for the adoption design. We identify causes of higher sibling- and trio-based  
33 estimates: prenatal indirect genetic effects, population stratification, and assortative mating. Our  
34 phenotype-agnostic, genetically sensitive approach has established overall environmental effects  
35 of parents' skills, facilitating future mechanistic work.

## 36 **Introduction**

37 Parents and children tend to have similar educational outcomes. Given the ties between  
38 education, social mobility and health<sup>1,2</sup>, understanding the mechanisms underlying the  
39 intergenerational transmission of education could inform efforts to alleviate inequalities. Many  
40 studies have investigated how much certain parental characteristics influence offspring  
41 education, but relatively few have considered non-cognitive skills. Whereas cognitive skills  
42 relate to learning and problem solving, non-cognitive skills are ‘socio-emotional’. Given the  
43 growing recognition of the importance of individuals’ non-cognitive skills for their educational  
44 outcomes<sup>3</sup>, it follows that parents’ non-cognitive skills might also matter.

45 Parents’ non-cognitive skills appear to be less salient for children’s education than parents’  
46 cognitive skills. In one study, sons’ standardised test scores at age 16 were more strongly  
47 associated with fathers’ cognitive than non-cognitive skills (0.47 and 0.09, respectively)<sup>4</sup>.  
48 Measures of parents’ non-cognitive skills also account for less of the intergenerational  
49 transmission of socioeconomic status than cognitive skills (10 vs 20%, respectively)<sup>5</sup>, and less of  
50 the socioeconomic gap in children’s achievement (8 vs 16%)<sup>6</sup>. Indicators of non-cognitive skills  
51 in these studies included self-esteem, locus of control<sup>5</sup>, attitudes and social skills<sup>6</sup>, and  
52 perseverance and extraversion<sup>4</sup>.

53 Two key limitations weaken this evidence based on the relative effects of parents’ cognitive and  
54 non-cognitive skills on offspring education: poor phenotypic assessments of parents’ non-  
55 cognitive skills, and genetic confounding.

56 First, regarding assessment, whereas cognitive skills can be directly measured by tests of  
57 domain-specific or general cognitive performance, non-cognitive skills are more challenging  
58 with measures often inconsistent, incomplete or unreliable<sup>7,8</sup>. There is little agreement on what  
59 non-cognitive skills to measure. Some researchers focus on personality, whereas others include  
60 self-control, self-esteem, motivation and interests. An alternative, broader definition of non-  
61 cognitive skills is all traits positively affecting educational success beyond cognitive skills<sup>9</sup>.  
62 Important non-cognitive characteristics may have been neglected – for instance, in the study by  
63 Grönqvist et al. (2017) direct skill measures for mothers, and paternal measures of motivation, a  
64 key education-linked trait, were unavailable. Importantly, studies identifying partial effects of  
65 specific parental cognitive and non-cognitive skills are less informative about the overall  
66 influences of these domains. More severe measurement error could also mean that effects of  
67 parents’ non-cognitive relative to cognitive skills have been underestimated.

68 Genetic methods offer a new approach to defining and estimating the importance of domains of  
69 parental skills for offspring education. Both cognitive and non-cognitive skills (as far as we  
70 know what they are) are substantially genetically influenced, with twin study heritability  
71 estimates of 40-70%<sup>10,11</sup>. Non-cognitive skills assessed in these studies included grit, intellectual  
72 curiosity, the Big Five personality traits, and subject-specific enjoyment and ability. A new  
73 method – ‘GWAS-by-subtraction’ – makes it possible to ‘subtract’ cognitive ability-related  
74 genetic variation from educational attainment genetic variation and assess the remaining latent  
75 genetic non-cognitive construct<sup>12</sup>. These non-cognitive aspects of educational attainment are  
76 independent of cognitive skills, and associated with higher socioeconomic attainment, more open  
77 and conscientious personality, and some psychiatric disorders (e.g., higher risk for schizophrenia,  
78 lower risk for attention deficit/hyperactivity disorder). A GWAS-by-subtraction-derived measure

79 of non-cognitive skills captures a broader construct that is not reliant upon measurement of  
80 specific traits. This method opens up the possibility of assessing the overall effect of all parent  
81 phenotypes that are influenced by common genetic variants linked to educational attainment,  
82 independent of cognitive skills. This could include parental phenotypes not traditionally classed  
83 as ‘non-cognitive’ or ‘skills’, such as mental health. This broad, phenotype-agnostic approach is  
84 a necessary first step towards characterizing pathways from parents’ skills to offspring  
85 educational outcomes. After establishing overall effects, subsequent studies can use phenotypic  
86 measures of parental non-cognitive skills to find specific mediating mechanisms.

87 Second, regarding genetic confounding, existing research relies on designs that cannot  
88 distinguish social (i.e., environmental) from genetic transmission. None of the associations  
89 between parental skills and offspring education cited above were estimated using genetically  
90 sensitive designs. This is problematic, because from just parent-offspring correlations one cannot  
91 conclude that parents’ skills shape offspring education, for instance by providing resources,  
92 experiences and support. Ignoring any shared genetic influences on parents’ skills and child  
93 educational outcomes confounds estimation of the effects of parental phenotypes on offspring  
94 outcome<sup>13</sup>. To establish the extent that parents’ (non-)cognitive skills influence child educational  
95 outcomes socially, it is vital to control for inherited genetic effects.

96 Genetic study designs can isolate environmental effects of parental skills on offspring education,  
97 controlling for genetic transmission. Several designs estimate a genetic effect of the child’s  
98 genotype on the child phenotype (direct genetic effect), and an environmentally mediated effect  
99 of the parental genotype on the child's phenotype (parental indirect genetic effect). For example,  
100 polygenic scores (individual-level indices of trait-specific genetic endowment; PGS) for

101 educational attainment based on parents' genotypes that were not transmitted to offspring, are  
102 associated with offspring attainment<sup>14-16</sup>. Non-transmitted variants affect offspring attainment  
103 indirectly via the environment shaped by parents that influences the development of their  
104 children. Complementary evidence of indirect effects of parents' education-linked genetics on  
105 offspring education has also accumulated from sibling and adoption designs<sup>14,15,17,18</sup>. It is not  
106 known whether parental indirect genetic effects on offspring education occur through cognitive  
107 or non-cognitive pathways (or both), because studies have not parsed out the contributions of  
108 sub-components of the educational attainment PGS.

109 Importantly, we directly compare estimates of parental indirect genetic effects obtained from  
110 different designs. Estimation of genetic associations may involve numerous biases<sup>19</sup>. Sibling,  
111 adoption and non-transmitted allele designs have different assumptions and subtle differences in  
112 biases and components affecting the estimated indirect genetic effect. As shown by our data  
113 simulations (see Supplementary Note and GitHub), indirect genetic effect estimates from the  
114 sibling and non-transmitted allele designs are more strongly biased by assortative mating and  
115 population stratification than the adoption design. Estimates obtained from the adoption design  
116 unfortunately do not capture prenatal parental environmental effects on child education. The  
117 sibling design may estimate parental indirect genetic effects with more bias from sibling genetic  
118 effects. Triangulation across designs and sensitivity analyses can help detect possible biases and  
119 quantify parental indirect genetic effects and other environmental effects.

120 In the current study (pre-registration: <https://osf.io/mk938/>), we use a novel approach to estimate  
121 the social effects of parents' cognitive and non-cognitive skills on offspring education. We  
122 deploy GWAS-by-subtraction to estimate individuals' genetic endowments (PGS) for cognitive

123 and non-cognitive skills, and test how much these operate environmentally via parental  
124 influences on offspring educational outcomes. We provide a multi-cohort comparison of parental  
125 indirect genetic effects in three cohorts of genotyped families in two countries with different  
126 educational systems (UK Biobank, UK Twins Early Development Study, Netherlands Twin  
127 Register). Each cohort includes multiple achievement outcome measures (i.e., standardised test  
128 results and teacher-reported grades in childhood and adolescence) and attainment (i.e., years of  
129 completed education reported in adulthood). We triangulate across three complementary study  
130 designs for estimating parental indirect genetic effects and assess the presence of components  
131 and biases.

## 132 **Results**

### 133 **GWAS-by-subtraction results**

134 We identified the genetic components of cognitive and non-cognitive skills using Genomic SEM,  
135 following Demange et al. 2020, in samples that excluded participants used for polygenic score  
136 analyses. Educational attainment and cognitive performance meta-analytic summary statistics  
137 (see Methods) were regressed on two independent latent variables, Cog and NonCog (see  
138 Supplementary Figure 1). These two latent factors were then regressed on 1,071,804 HapMap3  
139 SNPs in a genome wide association (GWA) design. The LD score regression-based SNP  
140 heritabilities of Cog and NonCog were 0.18 (SE=0.01) and 0.05 (SE=0.00), respectively. More  
141 information on the GWAS is presented in Supplementary Table 1.

## 142 **Descriptive statistics**

143 SNP associations with the Cog and NonCog latent variables provided the weights to create  
144 individual-level polygenic scores in 3 cohorts with family data and educational achievement  
145 and/or attainment outcomes. Sample sizes for individuals with polygenic score and educational  
146 outcome data were: 39,500 UK Biobank siblings, 6,409 UK Biobank adoptees, up to 4,796 DZ  
147 twins in the Twins Early Development Study (TEDS), up to 3,163 twins and siblings in the  
148 Netherlands Twin Register (NTR), and up to 2,534 NTR individuals with both parents  
149 genotyped. Full phenotypic descriptive statistics are available in Supplementary Table 2.

## 150 **Overview of the three designs for estimating direct and indirect polygenic** 151 **score effects**

152 To estimate direct offspring-led and indirect parent-led effects of polygenic scores for cognitive  
153 and non-cognitive skills on educational outcomes, we considered three family-based genomic  
154 designs. The designs are illustrated in Figure 1. All models jointly included Cog and NonCog  
155 PGS. Note that population effects are equivalent to PGS effects estimated in standard population  
156 analyses that do not use within-family data. In contrast, within-family designs exploit the  
157 principles of Mendelian segregation or the natural experiment of adoption to separate direct and  
158 indirect/social components of the overall population PGS effect. Importantly, a direct genetic  
159 effect is only direct in the sense that it does not originate from another individual's genotype.  
160 Direct effects are also not necessarily 'purely' genetic, but lead to educational outcomes via  
161 intermediate pathways, and are expressed in the context of environments.

162



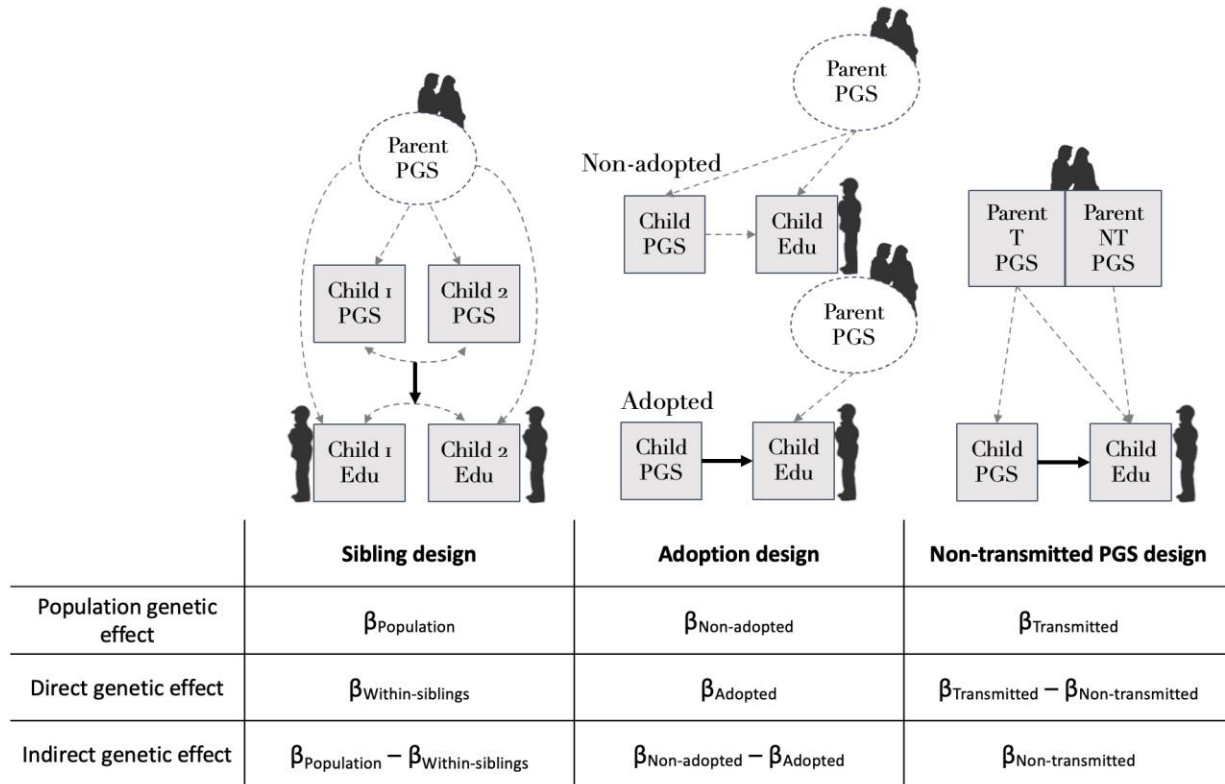

163

164 **Figure 1.** Analytical designs to estimate direct and parental indirect genetic effects. Note:  
 165 square = observed variable, circle = unobserved / latent variable;  $\beta$  = estimated effect of  
 166 polygenic score (PGS) on outcome; the population effect of a PGS captures both direct and  
 167 indirect genetic effects; direct genetic effects (controlling for indirect genetic effects) are  
 168 represented with solid arrows.

169

170 First, the sibling design estimates indirect genetic effects by comparing population-level and  
 171 within-family (i.e., within-sibling or within-DZ twin) polygenic score associations (equation  
 172 (1))<sup>17</sup>. The direct effect of a polygenic score is estimated based on genetic differences between  
 173 siblings, which are due to random segregations of parental genetic material, independent of  
 174 shared family effects (including parental indirect genetic effects). Specifically, the direct effect is  
 175 estimated using a variable representing individuals' (i) polygenic scores minus the average

176 polygenic score for their family (j): the within-family beta ( $\beta_{\text{Within}}$  in equation (1)). The  
177 population effect of a polygenic score is estimated in a separate model, simply regressing the  
178 outcome variable on polygenic score differences between individuals from different families  
179 (equation (2)). The indirect genetic effect is obtained by subtracting the within-family PGS effect  
180 estimate from the population effect estimate.

$$\begin{aligned} EA_{ij} = & \alpha_0 + \beta_{\text{WithinCog}} \left( \text{PGS}(\text{Cog})_{ij} - \overline{\text{PGS}(\text{Cog})_j} \right) \\ & + \beta_{\text{BetweenCog}} \left( \overline{\text{PGS}(\text{Cog})_j} \right) \\ & + \beta_{\text{WithinNonCog}} \left( \text{PGS}(\text{NonCog})_{ij} - \overline{\text{PGS}(\text{NonCog})_j} \right) \\ & + \beta_{\text{BetweenNonCog}} \left( \overline{\text{PGS}(\text{NonCog})_j} \right) + \text{sex} + \text{age} + \text{sex} * \text{age} \\ & + 10\text{PCs} + \text{genotyping platform} \end{aligned} \quad (1)$$

181

$$\begin{aligned} EA_{ij} = & \alpha_0 + \beta_{\text{Cog}} \left( \text{PGS}(\text{Cog})_{ij} \right) + \beta_{\text{NonCog}} \left( \text{PGS}(\text{NonCog})_{ij} \right) + \text{sex} + \text{age} \\ & + \text{sex} * \text{age} + 10\text{PCs} + \text{genotyping platform} \end{aligned} \quad (2)$$

182 Note: EA is the educational outcome, PGS is the polygenic score (for Cog PGS(Cog) and  
183 NonCog PGS(NonCog)).  $\overline{\text{PGS}}$  refers to the average polygenic score in the family j. i refers to the  
184 individual sibling.  $\alpha_0$  refers to the intercept, PCs are principal components to capture genetic  
185 ancestry. See Supplementary Note for a comparison of different versions of this sibling design,  
186 using data simulation.

187 Second, indirect genetic effects can be estimated by comparing polygenic score associations  
188 estimated in a sample of adoptees against those estimated for individuals who were reared by

189 their biological parents<sup>18</sup>. Therefore, we estimate the regression model shown in equation (2)  
190 separately for adoptees and for non-adopted individuals.

191 The population effect is estimated as the polygenic score effect on phenotypic variation among  
192 non-adopted individuals (i.e., a combination of direct and indirect genetic mechanisms). The  
193 direct genetic effect is the effect of the polygenic score among adoptees. Adoptees do not share  
194 genes by descent with their adoptive parents, so we expect their polygenic scores to be  
195 uncorrelated with the genotypes of their adoptive parents. Therefore, the polygenic score effect  
196 in adoptees cannot be inflated by environmentally mediated parental indirect genetic effects. In  
197 this design, the indirect genetic effect is estimated by subtracting this direct PGS effect from the  
198 population effect estimated in the non-adopted group. When taking the difference, it is important  
199 that the groups are similar in characteristics other than genetic relatedness to their parents. We  
200 did not find strong evidence for differences in several demographic and early-life characteristics  
201 of adoptees and non-adopted individuals in the UK Biobank (see Supplementary Table 11,  
202 Supplementary Note, and Supplementary Figure 2).

203 Third, indirect genetic effects can be estimated, and disentangled from direct genetic effects,  
204 using information on parental genetic variation that was not transmitted to offspring<sup>14,15</sup>  
205 (equation (3)).

$$\begin{aligned} EA = & \alpha_0 + \beta_{T_{Cog}}(PGS(Cog)_T) + \beta_{T_{NonCog}}(PGS(NonCog)_T) \\ & + \beta_{NT_{Cog}}(PGS(Cog)_{NT}) + \beta_{NT_{NonCog}}(PGS(NonCog)_{NT}) \quad (3) \\ & + \text{sex} + \text{age} + \text{sex} * \text{age} + 10PCs + \text{genotyping platform} \end{aligned}$$

206 The population effect is estimated from a polygenic score based on transmitted variants ( $\beta_T$ ).  
207 Transmitted genetic variants are present in an offspring and in at least one of their parents, and so  
208 may influence offspring education via both direct and indirect mechanisms. The parental indirect  
209 genetic effect is estimated as the effect of a polygenic score based on parental variants that were  
210 not transmitted to offspring ( $\beta_{NT}$ ). Non-transmitted variants can only take effect on offspring  
211 education through the environment. The direct genetic effect is estimated by partialling out the  
212 effect of the non-transmitted polygenic score from that of the transmitted polygenic score ( $\beta_T -$   
213  $\beta_{NT}$ ). Maternal and paternal scores are averaged in order to create overall parental non-  
214 transmitted polygenic scores.

215 **Parents' heritable cognitive and non-cognitive skills both influence offspring**  
216 **education indirectly via the environment.**

217 In the overall meta-analysis across cohorts, designs and outcomes, the Cog PGS showed a  
218 slightly stronger association with educational outcomes than the NonCog PGS (indicated by the  
219 total height of the bars in Figure 2a; population  $\beta_{NonCog}=0.22$ ,  $SE=0.01$ ; population  $\beta_{Cog}=0.25$ ,  
220  $SE=0.01$ ). We investigated environmental effects of parents' non-cognitive and cognitive skills  
221 on offspring education by estimating the contribution of parental indirect genetic effects to the  
222 population effects of NonCog and Cog PGS. Figure 2a shows that, for both NonCog and Cog  
223 PGS, indirect genetic effects of parents on offspring education were present (meta-analytic  
224 indirect  $\beta_{NonCog}=0.08$ ,  $SE=0.03$ ; indirect  $\beta_{Cog}=0.10$ ,  $SE=0.01$ ), in addition to direct genetic effects  
225 (direct  $\beta_{NonCog}=0.14$ ,  $SE=0.03$ ; direct  $\beta_{Cog}=0.15$ ,  $SE=0.02$ ). Averaged across all designs,  
226 outcomes and cohorts, indirect environmentally-mediated effects explained 36% of the  
227 population effect of the NonCog PGS, and 40% of the population effect of the Cog PGS.

228 However, results varied depending on the methods used and outcomes investigated. Results per  
229 cohort, outcome and design, as well as population genetic effects and the ratio of indirect to  
230 population effects are reported in Supplementary Table 3 and Supplementary Figure 3, 4 and 5.  
231 Meta-analytic results are reported in Supplementary Table 4. Z-tests results comparing direct and  
232 indirect effects are reported Supplementary Table 5.

233

234

235

236

237

238

239

240

241

242

a. Meta-analytic results

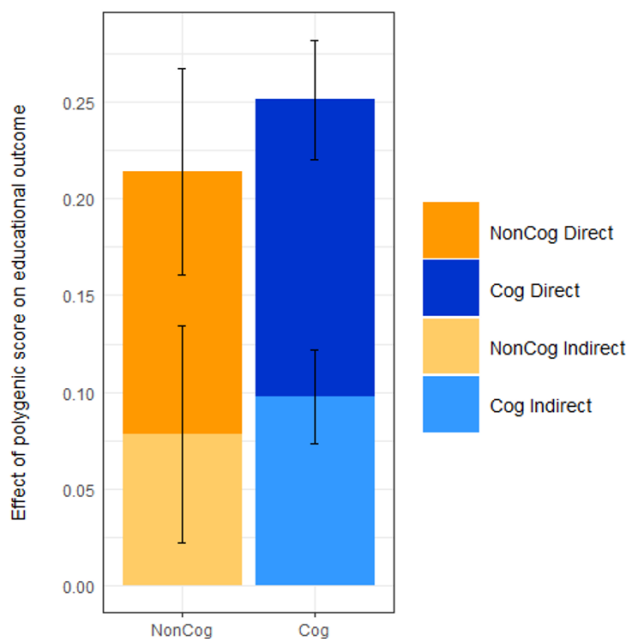

**Figure 2.**

a. Population effects of NonCog and Cog PGS on educational outcomes include both direct and indirect genetic mechanisms. Indirect genetic effects work through the environment that parents provide for their children. Notes: beta coefficients were obtained from meta-analysis of effects across cohorts, designs and outcome phenotypes; bars = 95% CIs.

b. Estimates of direct and indirect effects of NonCog and Cog PGS by cohort (for age 12 and adult outcomes), using the sibling design only. NTR is a Dutch cohort (N=1631 and N=3163 respectively), TEDS (N=2862) and UKB (N=16,624) are UK cohorts; bars = 95% CIs.

c. Estimates of direct and indirect effect of NonCog and Cog PGS by analytic design (for adult educational attainment outcomes only). Samples sizes: N=42,663 (results meta-analysed across UKB and NTR); N=6407 adoptees and 6500 non-adopted individuals (UKB); N=2534 trios in NTR; bars = 95% CIs.

b. Sibling design by cohort

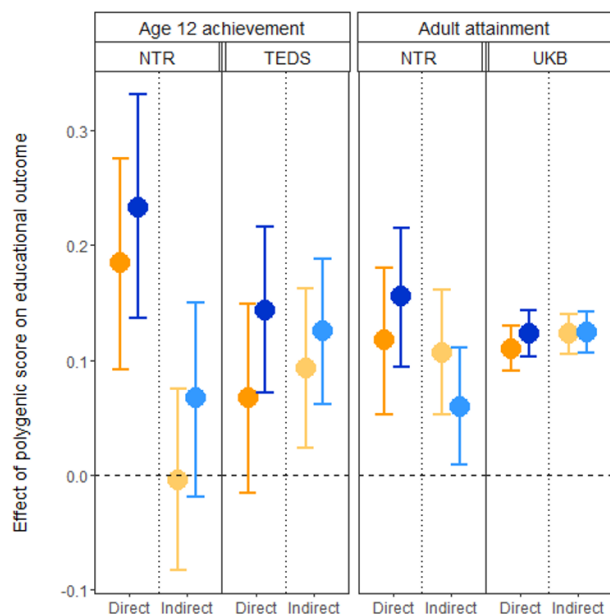

c. Educational attainment by design

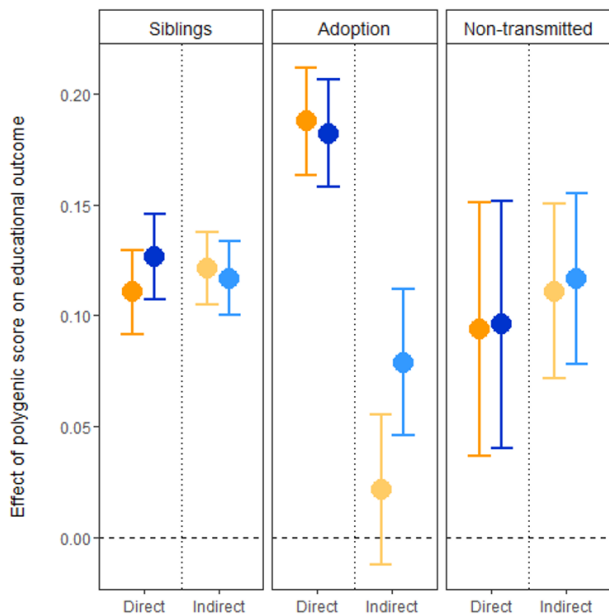

243 **Estimates of parental indirect genetic effects vary slightly by age, outcome**  
244 **and cohort.**

245 Figure 2b shows estimates of direct and indirect genetic effects of NonCog and Cog PGS for  
246 different cohorts and educational outcomes, holding the design constant (i.e., the sibling design,  
247 which was available for all cohorts and outcomes). Estimates were highly consistent across  
248 cohorts except for age 12 achievement in Dutch versus UK cohorts: indirect genetic effects were  
249 negligible and represented a small fraction of the population effect in NTR (3% and 23% for  
250 NonCog and Cog, respectively), whereas they accounted for 56% and 48% of the population  
251 effects of NonCog and Cog PGS in TEDS. For adult educational attainment, estimates of direct  
252 and indirect effects were more similar for the Dutch (NTR: indirect  $\beta_{\text{NonCog}}=0.11$ ,  $\text{SE}=0.03$ ;  
253 indirect  $\beta_{\text{Cog}}=0.06$ ,  $\text{SE}=0.03$ ) and UK (UKB: indirect  $\beta_{\text{NonCog}}=0.12$ ,  $\text{SE}=0.01$ ; indirect  $\beta_{\text{Cog}}=0.12$ ,  
254  $\text{SE}=0.01$ ) cohorts. See Supplementary Table 3 for full results.

255 **Estimates of indirect genetic effect depend on the analytical design: adoption-**  
256 **based estimates are lower.**

257 Figure 2c shows estimates of direct and indirect genetic effects of NonCog and Cog PGS for  
258 different designs, holding the phenotype constant (i.e., educational attainment, which was  
259 available for all three methods). While estimates obtained with sibling and non-transmitted PGS  
260 methods indicate equal indirect effect sizes (indirect  $\beta$ s for educational attainment ranged  
261 between 0.11-0.12; see Supplementary Tables 3 and 4), the adoption design yielded low to null  
262 indirect genetic effects for both NonCog and Cog PGS (indirect  $\beta_{\text{NonCog}}=0.02$ ,  $\text{SE}=0.02$ ; indirect  
263  $\beta_{\text{Cog}}=0.08$ ,  $\text{SE}=0.02$ ).

264 Figure 3 summarises how the three designs estimate parental indirect genetic effects in the  
265 presence of different contributors, thus highlighting explanations for lower adoption-based  
266 estimates. This information is based on simulations (see Supplementary Note, Supplementary  
267 Figure 9, and GitHub). First, unlike the sibling and non-transmitted allele designs, the adoption  
268 design does not capture indirect genetic effects occurring in the prenatal period. Second, the  
269 adoption design estimates indirect genetic effects with less bias from population stratification  
270 and assortative mating. Notably, the adoption design uniquely estimates parental indirect genetic  
271 effects without bias from assortative mating if there is no parental indirect genetic effect, and is  
272 slightly less biased by assortment than the other designs in the presence of a parental indirect  
273 genetic effect. Any excess indirect genetic effect estimated in the sibling/non-transmitted allele  
274 designs compared to the adoption design therefore indicates the overall impact of population  
275 stratification, assortative mating, and prenatal indirect genetic effects.

276 With the adoption design, the indirect genetic effect of the NonCog PGS on educational  
277 attainment in UK Biobank is 83% lower than with the sibling design, while it is only 33% lower  
278 for Cog. This suggests that estimates for NonCog are affected more strongly than Cog by  
279 population stratification, assortative mating and/or prenatal indirect genetic effects.

280 Indirect genetic effects from siblings are the only potential source of difference between sibling-  
281 and trio-based estimates – positive sibling effects inflate estimates from the sibling design but  
282 not the other (see Supplementary Note, Supplementary Figure 9, and GitHub). Since we did not  
283 find evidence of differences between results from these two designs, sibling indirect genetic  
284 effects are likely to be small or non-existent.



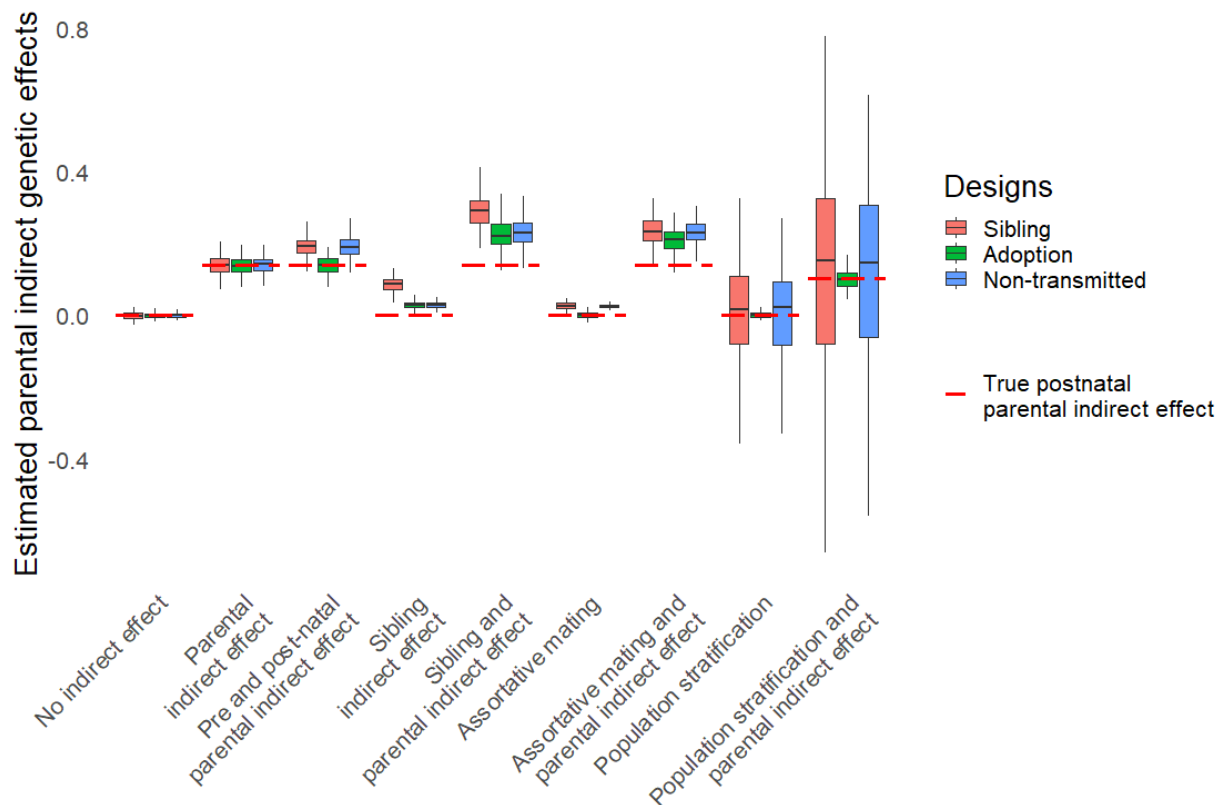

### Components and biases included in simulated data

285  
286 **Figure 3.** Estimates of parental indirect genetic effects from the three designs, based on data  
287 simulated to include different components (parental prenatal and postnatal indirect genetic  
288 effects) and biases (sibling indirect genetic effects, assortative mating, and population  
289 stratification). Boxplots of 100 replicates based on a simulated sample of 20,000 families. Red  
290 line is the true simulated (postnatal) parental indirect effect.

291  
292 **Population stratification and assortative mating, but not sibling indirect**  
293 **effects, might inflate estimates of indirect genetic effects from sibling and non-**  
294 **transmitted alleles designs.**

295 Although triangulating designs suggested that population stratification, assortative mating, and  
296 prenatal indirect genetic effects contribute to the higher estimated parental indirect genetic

297 effects from non-transmitted alleles/sibling designs relative to the adoption design, this approach  
298 cannot disentangle the relative importance of these individual biases. To this end, we conducted  
299 additional sensitivity analyses to assess the magnitudes of these biases (not pre-registered).

300 First, we analysed the GWAS summary data on which the polygenic scores were based, using  
301 LD score regression to detect population stratification. The LD score regression ratio statistics of  
302 uncorrected educational attainment and cognitive performance GWAS were 0.11 (SE=0.01) and  
303 0.06 (SE=0.01), respectively (Supplementary Table 1). These non-null estimates indicated that a  
304 small but significant portion of the GWAS signal was potentially attributable to residual  
305 population stratification. As CP seems less prone to population stratification than EA, it is  
306 possible our estimates of direct and indirect genetic effects of NonCog were more biased by  
307 population stratification than Cog.

308 Second, we detected slight evidence of assortative mating, which appeared stronger in the UK  
309 than Dutch cohorts. In NTR, parental PGS correlations are non-significant (NonCog  $r=0.03$ ,  
310 Cog  $r=0.02$ ). Sibling PGS intraclass correlations ranged between 0.49-0.52 in NTR, and between  
311 0.53-0.56 in TEDS and UK Biobank. This supports the presence of assortative mating on  
312 NonCog and Cog PGS potentially biasing our estimates of indirect genetic effects in UK cohorts,  
313 but less in our Dutch cohort. See Supplementary Table 6 for full correlations.

314 Third, we performed three sensitivity analyses, none of which supported the presence of indirect  
315 effects of siblings' NonCog and Cog PGS on individuals' educational outcomes. Our first  
316 approach leveraged sibling polygenic scores, the rationale being that in the presence of a sibling  
317 effect, a sibling's PGS will influence a child's outcome beyond child and parent PGS. In NTR,  
318 siblings' NonCog or Cog PGS had non-significant effects on achievement and attainment

319 (Supplementary Table 7). In a second approach, the difference in PGS effects on EA between  
320 monozygotic (MZ) and dizygotic (DZ) individuals was tested. Since MZ twins are more  
321 genetically similar than DZ twins, their PGS should capture more of the indirect genetic effect of  
322 their twin. In NTR and TEDS, PGS effects were not significantly different between MZs and  
323 DZs (Supplementary Table 8 & Supplementary Figure 6). Finally, in UKB, we tested PGS  
324 effects on EA given the number of siblings individuals reported having. If more siblings leads to  
325 a stronger sibling effect, this will be captured as an increased effect of an individual's own PGS  
326 on the outcome in the presence of more genetically related siblings. As a negative control, we  
327 conducted the same analysis in adoptees. Since adoptees are unrelated to their siblings, their PGS  
328 do not capture sibling effects at any family size. NonCog PGS effects weakly increased with  
329 number of siblings, but this pattern was also present in adoptees, suggesting confounding by  
330 unobserved characteristics of families with numerous children (Supplementary Table 9 &  
331 Supplementary Figure 7).

## 332 **Discussion**

333 We used genetic methods to study environmental effects of parents' skills on child education.  
334 We found evidence that characteristics tagged by NonCog and Cog polygenic scores (PGS) are  
335 both involved in how parents provide environments conducive to offspring education. Indeed,  
336 indirect genetic mechanisms explained 36% of the population effect of the NonCog PGS, and  
337 40% of the population effect of the Cog PGS (population  $\beta_{\text{NonCog}}=0.22$ ,  $\text{SE}=0.01$ ; population  
338  $\beta_{\text{Cog}}=0.25$ ,  $\text{SE}=0.01$ ). This result was consistent across countries, generations, outcomes and  
339 analytic designs, with two notable exceptions. First, estimated parental indirect genetic effects

340 were null for childhood achievement in our Dutch cohort (NTR), but not for comparable  
341 outcomes in our UK cohort (TEDS). Second, parental indirect genetic effects estimated with the  
342 adoption design were lower than for the sibling and non-transmitted allele designs, particularly  
343 for the NonCog PGS. Given our evidence from data simulations that the adoption-based  
344 estimates of indirect genetic effects are more robust to population stratification and assortative  
345 mating, these biases may contribute substantially in the other two designs, especially for the  
346 NonCog PGS. This was supported by results from sensitivity analyses.

347 This study demonstrates utility of genetic methods for assessing elusive phenomena: non-  
348 cognitive skills, and genuine environmental influences from parents, unconfounded by offspring-  
349 led effects of inherited genes. Compared to analysing a set of measured parental non-cognitive  
350 skills, our GWAS-by-subtraction approach captures a wider array of traits linked genetically to  
351 attainment, and therefore broadly quantifies the overall salience of parents' non-cognitive skills.  
352 Our evidence that parents' non-cognitive and cognitive skills are both important for children's  
353 education complements the growing literature that has considered effects of specific measured  
354 skills within both of these domains<sup>4,5</sup>. These studies found that effects of parents' non-cognitive  
355 skills on offspring education were less than half the size of the effects of parents' cognitive  
356 skills. In contrast, we found that indirect genetic effects of NonCog PGS were almost as large as  
357 for Cog skills. This discrepancy is likely to stem from our comprehensive definition of non-  
358 cognitive skills, as we do not rely on possibly unreliable and incomplete phenotypic measures.  
359 Importantly, the parental indirect genetic effects we have identified may capture proximal forms  
360 of 'nurture' (e.g., a parent directly training their child's cognitive skills, or cultivating their  
361 child's learning habits through participation and support) and/or more distal environmental  
362 effects (e.g., a parent's openness to experience leading them to move to an area with good

363 schools). The environmental effects of parents' non-cognitive and cognitive skills are likely to be  
364 larger than we estimate, because our approach only captures effects of parent skills tagged by  
365 current GWAS. Polygenic scores index a subset of the common genetic component of parent  
366 skills, which is in turn a fraction of the total genetic component (missing heritability<sup>20,21</sup>), and  
367 cannot account for the non-heritable component of parent skills.

368 The lower importance of parental indirect genetic effects for child achievement in the  
369 Netherlands compared to similar UK outcomes indicates that our UK achievement outcomes  
370 more strongly capture variation in family background. This difference could result from the  
371 design of these achievement measures: Dutch test results are standardized based on a  
372 representative population, but UK teacher reports might still be affected by student social  
373 background. Societal differences offer another explanation. Some argue that estimates of family  
374 shared-environmental variance in twin studies are indicators of social inequality, and this logic  
375 holds for indirect genetic effects<sup>22</sup>. For adult attainment, results were more consistent across UK  
376 and Dutch cohorts, corresponding with recent evidence for consistent shared-environment  
377 influence on educational attainment across social models<sup>23</sup>. This consistency also suggests that  
378 the difference in childhood is not due to a cohort or population difference. The higher indirect  
379 genetic effects in adult attainment might reflect an increase in environmental variance due to  
380 tracking in secondary schools in the Netherlands<sup>16</sup>. Socioeconomic disparities in achievement  
381 seem to increase more between ages 10 and 15 in the Netherlands than in the UK<sup>24</sup>. Despite no  
382 statistically significant parental indirect genetic effects on the achievement test at 12, children  
383 whose parents have a higher education are more likely to enroll in a higher educational track<sup>25</sup>,  
384 suggestive of greater parental effects on secondary and later education, which should be tested in  
385 further studies.

386 We found that the choice of design used to estimate indirect genetic effects matters, with the  
387 adoption design giving systematically lower estimates. Direct comparison of results across  
388 designs suggested that 33% (for Cog) and 83% (for NonCog) of the indirect genetic effects on  
389 adult educational attainment, estimated using the sibling design, are due to population  
390 stratification, assortative mating, and prenatal indirect genetic effects. The importance of  
391 population stratification for genetic associations with educational attainment was suggested by  
392 recent UK Biobank studies<sup>26,27</sup>, and was reflected in our sensitivity analyses. Our LD score  
393 regression results indicated residual population stratification, which was more severe for the  
394 NonCog GWAS. There was some evidence of assortative mating, with sibling PGS correlations  
395 above expectation ( $>0.5$ ) particularly in the UK cohorts. This country difference in assortment is  
396 supported by the lower estimated spouse PGS correlations in NTR (0.02 for Cog, 0.03 for  
397 NonCog) than for the EA PGS in the UK Biobank (0.06)<sup>28</sup>. There was no statistically significant  
398 difference in assortative mating between Cog and NonCog, suggesting that population  
399 stratification explains the particularly large design-based discrepancy between estimates of  
400 indirect genetic effects for NonCog. Population stratification should be carefully considered in  
401 studies using NonCog PGS. Methods should be developed to parse the contributions of  
402 assortative mating, population stratification, indirect and direct genetic effects to complex traits.  
403 This could be achieved using genomic data on extended pedigrees, inspired by extended twin-  
404 family designs<sup>29</sup>. Additionally, indirect genetic effects on education might not only arise from  
405 parents but might span across more than a single generation, for example the influence of  
406 grandparents. Since cumulative indirect genetic effects are all removed when a child is adopted,  
407 their presence would contribute to the observed difference in indirect effect between the adoption  
408 and other designs.

409 Regarding siblings, we did not find evidence that indirect effects of siblings' NonCog and Cog  
410 PGS affect individual differences in educational outcomes, using three different approaches. This  
411 corresponds with null findings regarding indirect effects of siblings' educational attainment  
412 genetics in the UK Biobank<sup>26,27</sup>. This does not rule out the existence of indirect sibling genetic  
413 effects in other populations (or effects such as parental compensation of sibling PGS  
414 differences<sup>30</sup>). Indirect genetic effects of sibling EA PGS were found in an Icelandic cohort<sup>15</sup>.  
415 One extended twin study found that the sibling environment contributed 12% of the total  
416 phenotypic variation in educational attainment in Norway, whereas the environment provided by  
417 parents explained only 2.5% of the variance<sup>31</sup>. It is possible that our PGS analyses were not  
418 sufficiently powered to detect indirect genetic effects of siblings, since they were based on lower  
419 sample size than our main analyses. However, our results suggest that indirect genetic effects of  
420 siblings on education are small. Therefore, our methods provide good proxies for parental  
421 indirect genetic effects, with minimal inflation from sibling effects.

422 Our data suggest that the adoption design provides a useful lower-bound estimate of indirect  
423 genetic effects of parents. Given that there was no evidence for sibling effects of the Cog or  
424 NonCog PGS, our adoption-based estimates, less biased by population stratification and  
425 assortative mating, are likely a closer measure of parental indirect genetic effects. However,  
426 three factors may make the adoption-based estimates of indirect genetic effects too conservative.  
427 First, adoption based indirect effect estimates exclude prenatal indirect genetic effects (and  
428 indirect genetic effects taking place between the birth and moment of adoption), which might  
429 influence educational outcomes<sup>32,33</sup>. While we are unable to test for prenatal indirect effects,  
430 these could be investigated in cohorts with pregnancy information, adjusting for postnatal  
431 indirect genetic effects. Second, adoptees may have been exposed to a narrower range of

432 environments (e.g., family socioeconomic status) compared to non-adopted individuals<sup>34</sup>. This  
433 form of selection bias is likely to increase the genetic variance at the expense of the indirect  
434 genetic effect. Third, selective placement of children in adoptive families matching  
435 characteristics of their biological families could result in correlation between child and  
436 (adoptive) parent genotypes, leading to an underestimation of the indirect genetic effect. There is  
437 modest evidence for selective placement of adoptees based on education in the US<sup>35</sup>. We cannot  
438 directly test for selection factors in the UK Biobank, since there is no information on the  
439 adoptive parents.

440 We acknowledge several limitations. First, while we suggest that an attribute of our study is the  
441 broad and phenotype-agnostic characterisation of non-cognitive skills, our GWAS-by-  
442 subtraction approach is unable to identify specific parental characteristics, and is also still limited  
443 by measures of cognitive performance and educational attainment in the original GWAS. Some  
444 cognitive skills might not be reflected in the available Cognitive Performance GWAS, so the  
445 NonCog factor could capture genetic influences affecting cognition. However, previous analyses  
446 have shown that NonCog PGS predicts substantially less variation in cognition than the Cog  
447 PGS<sup>36</sup>. Additionally, our NonCog latent variable reflects the residual variance of adult  
448 educational attainment, and therefore is a measure of non-cognitive aspects of adult EA. Non-  
449 cognitive aspects of childhood achievement might differ somewhat, which might lead to an  
450 underestimation of indirect genetic effects of the NonCog PGS on these outcomes. Second, the  
451 generalisability of our results is limited. Highly educated individuals are over-represented in all  
452 cohorts. Participation bias also affects GWAS results<sup>37</sup>. Selection effects may be especially  
453 strong in the adoption design as adoptions may depend on (partially heritable) phenotypes of the  
454 biological parents, and many adoptive parents are also selected on the basis of their (partially



455 heritable) behavioural phenotypes. Additionally, only participants of European descent were  
456 included in the analysis. Third, replication efforts are needed. Special effort should be targeted to  
457 include diverse ancestry participants. While our overall estimates are well powered due to the  
458 aggregation of cohorts, some analyses rely on a single sample. As such, results from these  
459 analyses might reflect specifics of these samples and not design-specific biases, and should be  
460 replicated. Finally, although our within-family methods allowed us to evaluate biases in  
461 polygenic score effects within the target samples, the same biases are likely to influence the  
462 effect size estimates from the original GWAS upon which our polygenic scores are based.  
463 Increasingly large within-sibship GWAS will allow this to be resolved.

464 Several future research directions emerge. First, given that we have quantified overall  
465 environmental effects of parents on offspring education tagged by NonCog and Cog PGS, the  
466 next step is to identify specific mediating parent characteristics, whether proximal or distal.  
467 Researchers could also examine mediating child characteristics on the pathway between their  
468 parents' characteristics and their own educational outcomes. We speculate that parents' non-  
469 cognitive skills do not affect offspring education by affecting those same non-cognitive skills in  
470 offspring. This is because existing twin research shows no influence of shared environmental  
471 factors on individual differences in children's measured non-cognitive skills such as grit and  
472 self-control<sup>38-40</sup>.

473 A second future direction is to incorporate gender and socioeconomic status into research on  
474 indirect genetic effects on education. Twin data show that shared environmental contributions to  
475 educational attainment are larger for women than for men<sup>23</sup>. It is unknown whether this finding  
476 holds for indirect genetic effects and for childhood achievement. Another gender aspect to  
477 consider is differential maternal and paternal indirect genetic effects<sup>41</sup>. There is some evidence

478 (although not genetically informed) that mother and father skills show unique associations with  
479 offspring education<sup>4</sup>. Indirect effects of parents' genetic endowment for non-cognitive skills on  
480 child education might be mediated or moderated by parents' income and cultural capital  
481 (including school-related skills and habits). While the home learning environment has been  
482 found to be more stimulating in higher socioeconomic status families<sup>42,43</sup>, there is recent  
483 evidence that low-income mothers report more frequent activities that facilitate cognitive  
484 stimulation<sup>44</sup>.

485

486 In sum, this study provides evidence for environmental effects of parents' non-cognitive and  
487 cognitive skills on offspring educational outcomes, indexed by indirect genetic effects of  
488 polygenic scores. Combining three cohorts and three designs for estimating indirect genetic  
489 effects allowed us to obtain robust findings. These results have significance for human health, as  
490 the role parents play in successful cognitive development and (mental) health development go  
491 hand in hand.

## 492 **Methods**

493 Our research complies with all relevant ethical regulations. Project approval for the Twins Early  
494 Development Study (TEDS) was granted by King's College London's ethics committee for the  
495 Institute of Psychiatry, Psychology and Neuroscience PNM/09/10–104. Ethical approval for the  
496 Netherlands Twin Register (NTR) was provided by the Central Ethics Committee on Research  
497 Involving Human Subjects of the VU University Medical Center, Amsterdam, and Institutional  
498 Review Board certified by the U.S. Office of Human Research Protections (IRB number IRB-

499 2991 under Federal-wide Assurance-3703; IRB/institute codes 94/105, 96/205, 99/068,  
500 2003/182, 2010/359) and participants provided informed consent. The UK Biobank has received  
501 ethical approval from the National Health Service North West Centre for Research Ethics  
502 Committee (reference: 11/NW/0382). Informed consent was obtained from all human  
503 participants.

504 The study methods were pre-registered on the Open Science Framework (<https://osf.io/mk938/>)  
505 on the 24/02/2020. Additional non-preregistered analyses are indicated as such below and should  
506 be considered exploratory. Additional deviations from the pre-registration are detailed in  
507 Supplementary Note.

## 508 **Samples**

### 509 **UK Biobank**

510 The UK Biobank is an epidemiological resource including British individuals aged 40 to 70 at  
511 recruitment<sup>45</sup>. Genome-wide genetic data came from the full release of the UK Biobank data, and  
512 were collected and processed according to the quality control pipeline<sup>46</sup>.

513 We defined three subsamples of the UK Biobank to be used for polygenic score analyses:  
514 adopted participants, a control group of non-adopted participants, and siblings. Starting with UK  
515 Biobank participants with QC genotype data and educational attainment data (N=451,229), we  
516 first identified 6,407 unrelated adopted individuals who said yes to the question “Were you  
517 adopted as a child?” (Data-Field 1767). We restricted the sample to unrelated participants  
518 (kinship coefficient  $< 1/(2^9/2)$ )<sup>47</sup>. Second, our comparison sample (N=6,500) was drawn at

519 random from non-adopted participants who were unrelated to each other and to the adopted  
520 participants. Third, we identified 39,500 full-siblings, excluding adopted individuals. We defined  
521 full-siblings as participants with a kinship coefficient between  $1/(2^{(3/2)})$  and  $1/(2^{(5/2)})$  and a  
522 probability of zero IBS sharing  $>0.0012$ , as suggested by <sup>46</sup> and <sup>47</sup>.

523 After excluding the three sub-samples for polygenic score analyses and individuals related to  
524 these participants, we were left with 388,196 UK Biobank individuals with educational  
525 attainment (EA) data, and 202,815 individuals with cognitive performance (CP) data. We used  
526 these remaining individuals for the GWAS of EA and CP, and later meta-analysis with external  
527 GWASs<sup>48</sup> (see ‘Statistical Analyses’ and Supplementary Note).

### 528 **Twins Early Development Study (TEDS)**

529 The Twins Early Development Study (TEDS) is a multivariate, longitudinal study of  $>10,000$   
530 twin pairs representative of England and Wales, recruited 1994–1996<sup>49</sup>. The demographic  
531 characteristics of TEDS participants and their families closely match those of families in the UK.  
532 Analyses were conducted on a sub-sample of dizygotic (DZ) twin pairs with genome-wide  
533 genotyping and phenotypic data on school achievement at age 12 (1,431 DZ pairs) and age 16  
534 (2,398 pairs).

### 535 **Netherlands Twins Register (NTR)**

536 The Netherlands Twin Register (NTR)<sup>50</sup> is established by the Department of Biological  
537 Psychology at the Vrije Universiteit Amsterdam and recruits children and adults twins for

538 longitudinal research. Data on health, personality, lifestyle and others, as well as genotyping data  
539 have been collected on participants and their families.

540 We included in our analyses genotyped European-ancestry participants. We created a subsample  
541 of full-siblings. NTR contains information on numerous monozygotic multiples (twins or  
542 triplets). Because MZ multiples share the same genes, we randomly excluded all individuals but  
543 one per MZ multiple. Only siblings with complete genetic and outcome data were subsequently  
544 included in the analyses: 1,631 siblings with CITO (achievement test taken during the last year  
545 of primary school) data (from 757 families) and 3,163 siblings with EA data available (from  
546 1,309 families).

547 We created a subsample with complete offspring, maternal and paternal genotypic data (i.e.,  
548 trios). Among individuals with available parental genotypes, respectively 1,526 (from 765  
549 families) and 2,534 (from 1,337 families) had reported CITO and EA information.

550 The sibling and trio subsets are not independent: for CITO, 823 participants are present in both  
551 subsets, 1,374 for EA.

## 552 **Phenotypic Measures**

### 553 **UK Biobank**

554 Educational attainment and cognitive performance phenotypes were defined following Lee et al.  
555 2018<sup>48</sup>. From data-field 6,238, educational attainment was defined according to ISCED  
556 categories and coded as the number of Years of Education. The response categories are: none of  
557 the above (no qualifications) = 7 years of education; Certificate of Secondary Education (CSEs)

558 or equivalent = 10 years; O levels/GCSEs or equivalent = 10 years; A levels/AS levels or  
559 equivalent = 13 years; other professional qualification = 15 years; National Vocational  
560 Qualification (NVQ) or Higher National Diploma (HNC) or equivalent = 19 years; college or  
561 university degree = 20 years of education. For cognitive performance, we used the (standardized)  
562 mean of the standardized scores of the fluid intelligence measure (data-field 20016 for in-person  
563 and 20191 for an online assessment).

## 564 **TEDS**

565 Educational achievement at age 12 was assessed by teacher reports, aggregated across the three  
566 core subjects (Mathematics, English, and Science).

567 Educational achievement at age 16 was assessed by self-reported results for standardized tests  
568 taken at the end of compulsory education in England, Wales and Northern Ireland: General  
569 Certificate of Secondary Education; GCSE). GCSE grades were coded from 4 (G; the minimum  
570 pass grade) to 11 (A\*; the highest possible grade). As with the age 12 measure, we analysed a  
571 variable representing mean score for the compulsory core subjects.

## 572 **NTR**

573 Educational attainment was measured by self-report of the highest obtained degree<sup>51</sup>. This  
574 measure was re-coded as the number of years in education, following Okbay et al. 2016<sup>52</sup>.

575 Academic achievement is assessed in the Netherlands by a nation-wide standardized educational  
576 performance test (CITO) around the age of 12 during the last year of primary education. CITO is  
577 used to determine tracking placement in secondary school in the Netherlands, in combination

578 with teacher advice. The total score ranges from 500 to 550, reflecting the child's position  
579 relative to the other children taking the test this particular year.

## 580 **Genotype quality control**

### 581 **UK Biobank**

582 SNPs from HapMap3 CEU (1,345,801 SNPs) were filtered out of the imputed UK Biobank  
583 dataset. We then did a pre-PCA QC on unrelated individuals, and filtered out SNPs with MAF <  
584 .01 and missingness > .05, leaving 1,252,123 SNPs. After removing individuals with non-  
585 European ancestry, we repeated the SNP QC on unrelated Europeans (N = 312,927), excluding  
586 SNPs with MAF < .01, missingness >.05 and HWE  $p < 10^{-10}$ , leaving 1,246,531 SNPs. The  
587 HWE p-value threshold of  $10^{-10}$  was based on:  
588 [http://www.nealelab.is/blog/2019/9/17/genotyped-snps-in-uk-biobank-failing-hardy-weinberg-](http://www.nealelab.is/blog/2019/9/17/genotyped-snps-in-uk-biobank-failing-hardy-weinberg-equilibrium-test)  
589 [equilibrium-test](http://www.nealelab.is/blog/2019/9/17/genotyped-snps-in-uk-biobank-failing-hardy-weinberg-equilibrium-test). We then created a dataset of 1,246,531 QC-ed SNPs for 456,064 UKB subjects  
590 of European ancestry. Principal components were derived from a subset of 131,426 genotyped  
591 SNPs, pruned for LD ( $r^2 > 0.2$ ) and long-range LD regions removed<sup>53</sup>. PCA was conducted on  
592 unrelated individuals using flashPCA v2<sup>54</sup>.

### 593 **TEDS**

594 Two different genotyping platforms were used because genotyping was undertaken in two  
595 separate waves. AffymetrixGeneChip 6.0 SNP arrays were used to genotype 3,665 individuals.  
596 Additionally, 8,122 individuals (including 3,607 DZ co-twin samples) were genotyped on  
597 Illumina HumanOmniExpressExome-8v1.2 arrays. After quality control, 635,269 SNPs

598 remained for AffymetrixGeneChip 6.0 genotypes, and 559,772 SNPs for  
599 HumanOmniExpressExome genotypes.

600 Genotypes from the two platforms were separately phased and imputed into the Haplotype  
601 Reference Consortium (release 1.1) through the Sanger Imputation Service before merging.  
602 Genotypes from a total of 10,346 samples (including 3,320 DZ twin pairs and 7,026 unrelated  
603 individuals) passed quality control, including 3,057 individuals genotyped on Affymetrix and  
604 7,289 individuals genotyped on Illumina. The identity-by-descent (IBD) between individuals was  
605  $< 0.05$  for 99.5% in the merged sample excluding the DZ co-twins (range = 0.00 – 0.12) and  
606 ranged between 0.36 and 0.62 for the DZ twin pairs (mean = 0.49). There were 7,363,646  
607 genotyped or well-imputed SNPs (for full genotype processing and quality control details, see<sup>55</sup>).

608 To ease high computational demands for the current study, we excluded SNPs with MAF  $< 1\%$   
609 and  $\text{info} < 1$ . Following this, 619216 SNPs were included in polygenic score construction.

610 Principal components were derived from a subset of 39,353 common (MAF  $> 5\%$ ), perfectly  
611 imputed ( $\text{info} = 1$ ) autosomal SNPs, after stringent pruning to remove markers in linkage  
612 disequilibrium ( $r^2 > 0.1$ ) and excluding high linkage disequilibrium genomic regions to ensure  
613 that only genome-wide effects were detected.

## 614 **NTR**

615 Genotyping was done on multiple platforms, following manufacturers protocols: Perlegen-  
616 Affymetrix, Affymetrix 6.0, Affymetrix Axiom, Illumina Human Quad Bead 660, Illumina Omni  
617 1M and Illumina GSA. For each genotype platform, samples were removed if DNA sex did not  
618 match the expected phenotype, if the PLINK heterozygosity F statistic was  $< -0.10$  or  $> 0.10$ , or



619 if the genotyping call rate was  $< 0.90$ . SNPs were excluded if the MAF  $< 1 \times 10^{-6}$ , if the Hardy-  
620 Weinberg equilibrium p-value was  $< 1 \times 10^{-6}$ , and/or if the call rate was  $< 0.95$ . The genotype  
621 data was then aligned with the 1000 Genomes reference panel using the HRC and 1000 Genomes  
622 checking tool, testing and filtering for SNPs with allele frequency differences larger than 0.20 as  
623 compared to the CEU population, palindromic SNPs and DNA strand issues. The data of the  
624 different platforms was then merged into a single dataset, and one platform was chosen for each  
625 individual. Based on the  $\sim 10.8k$  SNPs that all platforms have in common, DNA identity-by-  
626 descent state was estimated for all individual pairs using the Plink and King programs. Samples  
627 were excluded if these estimates did not correspond to expected familial relationships. CEU  
628 population outliers, based on per platform 1000 Genomes PC projection with the Smartpca  
629 software, were removed from the data. Then, per platform, the data was phased using Eagle and  
630 then imputed to 1000 Genomes and Topmed using Minimac following the Michigan imputation  
631 server protocols. Post-imputation, the resulting separate platform VCF files were merged with  
632 Bcftools into a single file per chromosome for each reference, for SNPs present on all platforms.  
633 For the polygenic scoring and parental re-phasing, the imputed data were converted to best guess  
634 data and were filtered to include only ACGT SNPs, SNPs with MAF  $> 0.01$ , HWE  $p > 10^{-5}$  and  
635 a genotype call rate  $> 0.98$ , and to exclude SNPs with more than 2 alleles. All mendelian errors  
636 were set to missing. The remaining SNPs represent the transmitted alleles dataset. 20 PCs were  
637 calculated with Smartpca using LD-pruned 1000 Genomes-imputed SNPs genotyped on at least  
638 one platform, having MAF  $> 0.05$  and not present in the long-range LD regions. Using the --tucc  
639 option of the Plink 1.07 software pseudo-controls for each offspring were created, given the  
640 genotype data of their parents. This resulted in the non-transmitted alleles dataset, as these  
641 pseudo-controls correspond to the child's non-transmitted alleles. To determine the parental

642 origin of each allele, the transmitted and non-transmitted datasets were phased using the  
643 duoHMM option of the ShapeIT software. The phased datasets were then split based on parental  
644 origin, resulting in a paternal and maternal haploid dataset for the transmitted and non-  
645 transmitted alleles.

## 646 **Statistical analyses**

647 All statistical tests are two-sided, unless otherwise stated.

### 648 **NonCog GWAS-by-subtraction**

649 To generate NonCog summary statistics, we implemented a GWAS-by-subtraction using  
650 Genomic SEM following Demange et al. 2020 using summary statistics of EA and cognitive  
651 performance obtained in samples independent from our polygenic score samples.

652 We ran a GWAS of Educational Attainment and Cognitive Performance in UK Biobank  
653 (polygenic score sample left-out). We meta-analysed them with the EA GWAS by Lee et al.  
654 excluding 23andMe, UK Biobank and NTR cohorts, and with the CP GWAS by Trampush et al.  
655 respectively (EA total N=707,112 and CP N=238,113). More information on these methods and  
656 intermediate GWAS are found in Supplementary Note and Supplementary Table 1.

657 Following Demange et al. 2020, we used EA and CP meta-analysed summary statistics to create  
658 two independent latent variables: Cog, representing the genetic variance shared between EA and  
659 CP, and NonCog representing the residual genetic variance of EA when regressing out CP  
660 (Supplementary Figure 1). These two latent factors were regressed on each SNP: we obtained

661 association for 1,071,804 SNPs (HapMap3 SNPs, as recommended when comparing PGS  
662 analyses across cohorts). We calculate the effective sample size of these GWAS to be 458,211  
663 for NonCog and 223,819 for Cog.

## 664 **Polygenic Score construction in UK Biobank, TEDS and NTR**

665 Polygenic scores of NonCog and Cog were computed with Plink software (version 1.9 for NTR,  
666 2 for UKB and TEDS) <sup>56,57</sup> based on weighted betas obtained using the LD-pred v1.0.0 software  
667 using infinitesimal prior, a LD pruning window of 250kb and 1000Genomes phase 3 CEU  
668 population as LD reference. Weighted betas were computed in a shared pipeline. In NTR, scores  
669 for non-transmitted and transmitted genotypes were obtained for fathers and mothers separately  
670 so we average them to obtain the mid-parent score.

## 671 **Polygenic score model fitting**

672 Each model included cognitive and non-cognitive polygenic scores simultaneously and  
673 controlled for: 10 ancestry principal components (PCs), sex and age, interaction between sex and  
674 age, and cohort-specific platform covariate (NTR: genotyping platform, UKB: array, TEDS:  
675 batch). Polygenic scores and outcome variables were scaled. Age was estimated by year of birth,  
676 age at recruitment or age at testing depending on the cohorts, see Supplementary Table 2.  
677 Correlations between NonCog and Cog PGS, as well as between and within-family PGS are  
678 reported Supplementary Table 10.

679 All regressions were linear models with `lm()` in R rather than mixed models as in previous  
680 analyses<sup>16,17</sup> and our pre-registered methods. See Supplementary Note: Deviation from pre-  
681 registered methods for the justification based on simulated data. We obtained bootstrapped

682 standard errors and bias-corrected confidence intervals (normal approximation) for the  
683 population, indirect and direct effects, as well as the ratios of indirect/direct and  
684 indirect/population effect. We ran ordinary non-parametric bootstraps using 10,000 replications  
685 with boot() in R. For the sibling design, where two independent regressions are used, we use the  
686 same bootstrap samples for both (both regressions were run within the same boot object). For the  
687 adoption design, the bootstrapped samples are drawn from the adopted and non-adopted samples  
688 separately. The bootstrap estimates were used to test for the difference between the direct and  
689 indirect effect in both Cog and NonCog and the difference between the ratio indirect/population  
690 for Cog and NonCog, using Z-tests.

## 691 **Additional analyses (not pre-registered)**

### 692 **Meta-analyses**

693 To estimate the overall indirect and direct effects of NonCog and Cog polygenic scores, we  
694 meta-analysed estimates across cohorts, designs and phenotypic outcomes.

695 To compare results obtained across the three different designs, we meta-analysed effect sizes  
696 obtained from each design across cohorts, but holding the outcome constant (educational  
697 attainment). The adoption design was only applied to EA in UKB, hence no meta-analysis was  
698 necessary.

699 Meta-analyses were conducted using the command rma.mv() in the R package metafor. Design  
700 was specified as a random intercept factor, except when results were meta-analysed within-  
701 design.

## 702 **Investigation of the presence of biases**

### 703 **Population stratification**

704 Population stratification refers to the presence of systematic difference in allele frequencies  
705 across subpopulations, arising from ancestry difference due to non-random mating and genetic  
706 drift. This leads to confounding in genetic association studies. In a PGS analysis, bias due to  
707 population stratification can arise from both the GWAS used to create the scores and the target  
708 sample. We corrected for population stratification in the target sample by adjusting analyses for  
709 PCs (although this may not remove fine-scale stratification). For the GWAS summary statistics,  
710 the ratio statistics LDSC output is a standard measure of population stratification<sup>58</sup>. As a rule of  
711 thumb a LDSC intercept higher than 1 (inflated) indicates presence of population stratification.  
712 Because we corrected the standard errors of the EA GWAS for inflation and GenomicSEM  
713 corrects for inflation as well, the ratio statistics of the Cog and NonCog GWAS are not a valid  
714 indication of population stratification (ratio <0 following GC correction). We therefore use the  
715 ratio statistics of uncorrected EA and CP GWAS as proxies. Ratio and LDscore intercept was  
716 assessed with the ldsc software<sup>58</sup>.

### 717 **Assortative mating**

718 Assortative mating refers to the non-random mate choice, with a preference for spouses with  
719 similar phenotypes. If these preferred phenotypes have a genetic component, assortative mating  
720 leads to an increased genetic correlation between spouses, as well as between relatives<sup>28</sup>.  
721 Assortative mating can therefore be inferred from elevated correlations between polygenic scores  
722 in siblings (correlations would be 0.5 without assortative mating) and between parents

723 (correlations would be 0 without assortative mating). We estimated sibling intraclass correlations  
724 of Cog and NonCog PGS in UKB, TEDS and NTR, and Pearson’s correlations of paternal and  
725 maternal Cog and NonCog PGS in NTR. Notably, these observed correlations cannot distinguish  
726 assortative mating from population stratification.

## 727 **Sibling effects**

728 We performed three additional analyses to investigate indirect genetic effects of siblings on  
729 educational outcomes.

730 First, we ran a linear mixed model extending our main non-transmitted alleles design to include  
731 polygenic scores of siblings (equation (4)). To this end, we used data from NTR on DZ pairs and  
732 both of their parents. Sample sizes of genotyped ‘quads’ with offspring CITO or EA phenotypes  
733 were 657 and 788, respectively.

$$\begin{aligned} EA = & \alpha_0 + \beta_{T_{Cog}}(PGS(Cog)_T) + \beta_{T_{NonCog}}(PGS(NonCog)_T) \\ & + \beta_{NT_{Cog}}(PGS(Cog)_{NT}) + \beta_{NT_{NonCog}}(PGS(NonCog)_{NT}) \\ & + \beta_{Sibling_{Cog}}(PGS(Cog)_{Sibling}) \\ & + \beta_{Sibling_{NonCog}}(PGS(NonCog)_{Sibling}) + sex + age + sex \\ & * age + 10PCs + genotyping platform \end{aligned} \quad (4)$$

734

735 Second, we can also assess the presence of sibling genetic effects using monozygotic and  
736 dizygotic twins. Because monozygotic twins have the same genotypes, the genetically-mediated  
737 environment provided by the cotwin is more correlated to the twin genotype in MZ twins than in

738 DZ twins. The sibling genetic effect is more strongly reflected in the polygenic score prediction  
739 of the educational outcome for MZ twins than for DZ twins. If the sibling genetic effect is  
740 negative, the polygenic score effect (betas) on the outcome in people that have an MZ twin will  
741 be lower than in people that have a DZ twin, it will be higher in those with an MZ twin than  
742 those with an DZ twin if the sibling genetic effect is positive. We therefore compare Betas from  
743 equation (2) in a subset of MZ twins and in a subset of DZ twins (one individual per pair) in both  
744 NTR ( $N_{MZ}=818$  &  $N_{DZ}=865$  for CITO and  $N_{MZ}=1,600$  &  $N_{DZ}=1,369$  for EA) and TEDS  
745 ( $N_{MZ}=546$  &  $N_{DZ}=2,709$ )

746 Third, the presence of sibling genetic effects can be assessed using data on the number of  
747 siblings participants have. If an individual has more siblings we expect their polygenic scores to  
748 be more correlated to sibling effects. As the number of siblings increases (if we assume linear  
749 increase) so does the degree to which a PGS captures sibling effects. If the sibling genetic effect  
750 is positive, the effect of the Cog and NonCog PGS on the educational outcome should increase  
751 with the number of siblings. However, family characteristics and environment might differ  
752 across families depending on the number of children. Therefore, changes in the effect of the PGS  
753 on our outcome with the number of siblings could be due to factors other than sibling genetic  
754 effects (for example, there is a known negative genetic association between number of children  
755 and EA<sup>59</sup> which could result in confounding). By also looking at changes in the effect of the Cog  
756 and NonCog PGS on the educational outcome in adopted (unrelated) sibships, we break the  
757 correlation between PGS and any sibling effects. If there is a change in PGS effect on the  
758 educational outcome in adopted children dependent on the number of (non-biological) siblings,  
759 we can assume this effect to be caused by mechanisms other than a sibling effect. We finally  
760 contrast the change in PGS depending on family size in biological and adopted siblings to get an

761 idea of the sibling effect minus any other confounding effects of family size. We use the total  
762 number of reported siblings (full siblings for non-adopted and adopted siblings for adopted  
763 individuals, data-fields: 1873, 1883, 3972 & 3982).

## 764 **Data availability**

765 Summary Statistics of Cog and NonCog used in this paper are available upon request. Summary  
766 Statistics of cognitive performance from the COGENT cohort, of EA excluding NTR and UK  
767 Biobank cohorts are available upon request to the communicating author of these papers.

768 For UK Biobank dataset access, see: <https://www.ukbiobank.ac.uk/using-the-resource/>.

769 Netherlands Twin Register data may be accessed, upon approval of the data access committee,  
770 email: [ntr.datamanagement.fgb@vu.nl](mailto:ntr.datamanagement.fgb@vu.nl)

771 Researchers can apply for access to TEDS data: [https://www.teds.ac.uk/researchers/teds-data-](https://www.teds.ac.uk/researchers/teds-data-access-policy)  
772 [access-policyhttps://www.teds.ac.uk/researchers/teds-data-access-policy](https://www.teds.ac.uk/researchers/teds-data-access-policy)

## 773 **Code availability**

774 All scripts used to run the analyses (empirical and simulated) are available at:  
775 <https://github.com/PerlineDemange/GeneticNurtureNonCog>

776 All additional software used to perform the analyses are available online.

777 The pre-registration of the study is available on OSF: <https://osf.io/mk938/>



778 References

- 779 1. Deary, I. J. *et al.* Intergenerational social mobility and mid-life status attainment: Influences  
780 of childhood intelligence, childhood social factors, and education. *Intelligence* **33**, 455–472  
781 (2005).
- 782 2. Oreopoulos, P. & Salvanes, K. G. Priceless: the nonpecuniary benefits of schooling. *Journal*  
783 *of Economic Perspectives* **25**, 159–184 (2011).
- 784 3. Heckman, J., Stixrud, J. & Urzua, S. *The effects of cognitive and noncognitive abilities on*  
785 *labor market outcomes and social behavior.* (National Bureau of Economic Research,  
786 2006). doi:10.3386/w12006
- 787 4. Grönqvist, E., Öckert, B. & Vlachos, J. The intergenerational transmission of cognitive and  
788 noncognitive abilities. *J. Human Resources* **52**, 887–918 (2017).
- 789 5. Doren, C. & Grodsky, E. What Skills Can Buy: Transmission of advantage through  
790 cognitive and noncognitive skills. *Sociol Educ* **89**, 321–342 (2016).
- 791 6. Crawford, Goodman, Joyce. Explaining the socio-economic gradient in child outcomes: the  
792 inter-generational transmission of cognitive skills. *Longit. Life Course Stud.* **2**, (2011).
- 793 7. Morris, T. T., Davey Smith, G., Van den Berg, G. & Davies, N. M. Investigating the  
794 phenotypic consistency and genetic architecture of noncognitive skills. *BioRxiv* (2018).  
795 doi:10.1101/470682
- 796 8. Gutman and Schoon. *The impact of non-cognitive skills on outcomes for young people.* (The  
797 Education Endowment Foundation (EEF) and the UK Cabinet Office, 2013).
- 798 9. Heckman, J. J. & Rubinstein, Y. The Importance of Noncognitive Skills: Lessons from the  
799 GED Testing Program. *American Economic Review* **91**, 145–149 (2001).
- 800 10. Tucker-Drob, E. M., Briley, D. A., Engelhardt, L. E., Mann, F. D. & Harden, K. P.  
801 Genetically-mediated associations between measures of childhood character and academic  
802 achievement. *J. Pers. Soc. Psychol.* **111**, 790–815 (2016).

- 803 11. Kovas, Y. *et al.* Why children differ in motivation to learn: Insights from over 13,000 twins  
804 from 6 countries. *Pers. Individ. Dif.* **80**, 51–63 (2015).
- 805 12. Demange, P. A. *et al.* Investigating the genetic architecture of noncognitive skills using  
806 GWAS-by-subtraction. *Nat. Genet.* **53**, 35–44 (2021).
- 807 13. Hart, S. A., Little, C. & van Bergen, E. Nurture might be nature: cautionary tales and  
808 proposed solutions. *NPJ Sci. Learn.* **6**, 2 (2021).
- 809 14. Bates, T. C. *et al.* The Nature of Nurture: Using a Virtual-Parent Design to Test Parenting  
810 Effects on Children’s Educational Attainment in Genotyped Families. *Twin Res Hum Genet*  
811 **21**, 73–83 (2018).
- 812 15. Kong, A. *et al.* The nature of nurture: Effects of parental genotypes. *Science* **359**, 424–428  
813 (2018).
- 814 16. de Zeeuw, E. L. *et al.* Intergenerational transmission of education and ADHD: effects of  
815 parental genotypes. *Behav Genet* **50**, 221–232 (2020).
- 816 17. Selzam, S. *et al.* Comparing Within- and Between-Family Polygenic Score Prediction. *Am.*  
817 *J. Hum. Genet.* **105**, 351–363 (2019).
- 818 18. Cheesman, R. *et al.* Comparison of Adopted and Nonadopted Individuals Reveals Gene-  
819 Environment Interplay for Education in the UK Biobank. *Psychol. Sci.* **31**, 582–591 (2020).
- 820 19. Morris, T. T., Davies, N. M., Hemani, G. & Smith, G. D. Population phenomena inflate  
821 genetic associations of complex social traits. *Sci. Adv.* **6**, eaay0328 (2020).
- 822 20. Manolio, T. A. *et al.* Finding the missing heritability of complex diseases. *Nature* **461**, 747–  
823 753 (2009).
- 824 21. Young, A. I. Solving the missing heritability problem. *PLoS Genet.* **15**, e1008222 (2019).
- 825 22. Kovas, Y. *et al.* Literacy and numeracy are more heritable than intelligence in primary  
826 school. *Psychol. Sci.* **24**, 2048–2056 (2013).

- 827 23. Silventoinen, K. *et al.* Genetic and environmental variation in educational attainment: an  
828 individual-based analysis of 28 twin cohorts. *Sci. Rep.* **10**, 12681 (2020).
- 829 24. OECD. *Equity in education: breaking down barriers to social mobility.* (OECD, 2018).  
830 doi:10.1787/9789264073234-en
- 831 25. van Spijker, F., van der Houwen, K. & van Gaalen, R. Invloed ouderlijk opleidingsniveau  
832 reikt tot ver in het voortgezet onderwijs. *Economisch-Statistische Berichten* (2017).
- 833 26. Young, A. I. *et al.* Mendelian imputation of parental genotypes for genome-wide estimation  
834 of direct and indirect genetic effects. *BioRxiv* (2020). doi:10.1101/2020.07.02.185199
- 835 27. Kong, A., Benonisdottir, S. & Young, A. I. Family Analysis with Mendelian Imputations.  
836 *BioRxiv* (2020). doi:10.1101/2020.07.02.185181
- 837 28. Yengo, L. *et al.* Imprint of assortative mating on the human genome. *Nat. Hum. Behav.* **2**,  
838 948–954 (2018).
- 839 29. Keller, M. C. *et al.* Modeling extended twin family data I: description of the Cascade model.  
840 *Twin Res Hum Genet* **12**, 8–18 (2009).
- 841 30. Fletcher, J. M., Wu, Y., Zhao, Z. & Lu, Q. The production of within-family inequality:  
842 Insights and implications of integrating genetic data. *BioRxiv* (2020).  
843 doi:10.1101/2020.06.06.137778
- 844 31. Lyngstad, T. H., Ystrøm, E. & Zambrana, I. M. An Anatomy of Intergenerational  
845 Transmission: Learning from the educational attainments of Norwegian twins and their  
846 parents. (2017). doi:10.31235/osf.io/fby2t
- 847 32. Armstrong-Carter, E. *et al.* The earliest origins of genetic nurture: prenatal environment  
848 mediates the association between maternal genetics and child development. (2019).  
849 doi:10.31234/osf.io/2usk8
- 850 33. Trejo, S. Exploring genetic influences on birth weight. (2020). doi:10.31235/osf.io/7j59q

- 851 34. McGue, M. *et al.* The environments of adopted and non-adopted youth: evidence on range  
852 restriction from the Sibling Interaction and Behavior Study (SIBS). *Behav Genet* **37**, 449–  
853 462 (2007).
- 854 35. Ho, H., Plomin, R. & DeFries, J. C. Selective placement in adoption. *Soc Biol* **26**, 1–6  
855 (1979).
- 856 36. Demange, P. A. *et al.* Investigating the Genetic Architecture of Non-Cognitive Skills Using  
857 GWAS-by-Subtraction. *BioRxiv* (2020). doi:10.1101/2020.01.14.905794
- 858 37. Pirastu, N. *et al.* Genetic analyses identify widespread sex-differential participation bias.  
859 *BioRxiv* (2020). doi:10.1101/2020.03.22.001453
- 860 38. Rimfeld, K., Kovas, Y., Dale, P. S. & Plomin, R. True grit and genetics: Predicting  
861 academic achievement from personality. *J. Pers. Soc. Psychol.* **111**, 780–789 (2016).
- 862 39. Willems, Y. E., Boesen, N., Li, J., Finkenauer, C. & Bartels, M. The heritability of self-  
863 control: A meta-analysis. *Neurosci. Biobehav. Rev.* **100**, 324–334 (2019).
- 864 40. Malanchini, M., Engelhardt, L. E., Grotzinger, A. D., Harden, K. P. & Tucker-Drob, E. M.  
865 “Same but different”: Associations between multiple aspects of self-regulation, cognition,  
866 and academic abilities. *J. Pers. Soc. Psychol.* (2018). doi:10.1037/pspp0000224
- 867 41. Eilertsen, E. M. *et al.* Direct and indirect effects of maternal, paternal, and offspring  
868 genotypes: Trio-GCTA. *BioRxiv* (2020). doi:10.1101/2020.05.15.097840
- 869 42. Lareau, A. *Unequal Childhoods*. (University of California Press, 2011).
- 870 43. van Bergen, E., van Zuijen, T., Bishop, D. & de Jong, P. F. Why are home literacy  
871 environment and children’s reading skills associated? what parental skills reveal. *Read Res*  
872 *Q* **52**, 147–160 (2017).
- 873 44. Cooper, K. Are Poor Parents *Poor* Parents? The Relationship between Poverty and  
874 Parenting among Mothers in the UK. *Sociology* 003803852093939 (2020).  
875 doi:10.1177/0038038520939397

- 876 45. Allen, N. E., Sudlow, C., Peakman, T., Collins, R. & UK Biobank. UK biobank data: come  
877 and get it. *Sci. Transl. Med.* **6**, 224ed4 (2014).
- 878 46. Bycroft, C. *et al.* The UK Biobank resource with deep phenotyping and genomic data.  
879 *Nature* **562**, 203–209 (2018).
- 880 47. Manichaikul, A. *et al.* Robust relationship inference in genome-wide association studies.  
881 *Bioinformatics* **26**, 2867–2873 (2010).
- 882 48. Lee, J. J. *et al.* Gene discovery and polygenic prediction from a genome-wide association  
883 study of educational attainment in 1.1 million individuals. *Nat. Genet.* **50**, 1112–1121  
884 (2018).
- 885 49. Rimfeld, K. *et al.* Twins Early Development Study: A Genetically Sensitive Investigation  
886 into Behavioral and Cognitive Development from Infancy to Emerging Adulthood. *Twin Res*  
887 *Hum Genet* **22**, 508–513 (2019).
- 888 50. Ligthart, L. *et al.* The Netherlands Twin Register: Longitudinal Research Based on Twin  
889 and Twin-Family Designs. *Twin Res Hum Genet* **22**, 623–636 (2019).
- 890 51. Abdellaoui, A. *et al.* Educational attainment influences levels of homozygosity through  
891 migration and assortative mating. *PLoS One* **10**, e0118935 (2015).
- 892 52. Okbay, A. *et al.* Genome-wide association study identifies 74 loci associated with  
893 educational attainment. *Nature* **533**, 539–542 (2016).
- 894 53. Abdellaoui, A. *et al.* Population structure, migration, and diversifying selection in the  
895 Netherlands. *Eur. J. Hum. Genet.* **21**, 1277–1285 (2013).
- 896 54. Abraham, G., Qiu, Y. & Inouye, M. FlashPCA2: principal component analysis of Biobank-  
897 scale genotype datasets. *Bioinformatics* **33**, 2776–2778 (2017).
- 898 55. Selzam, S. *et al.* Evidence for gene-environment correlation in child feeding: Links between  
899 common genetic variation for BMI in children and parental feeding practices. *PLoS Genet.*  
900 **14**, e1007757 (2018).

- 901 56. Purcell, S. *et al.* PLINK: a tool set for whole-genome association and population-based  
902 linkage analyses. *Am. J. Hum. Genet.* **81**, 559–575 (2007).
- 903 57. Chang, C. C. *et al.* Second-generation PLINK: rising to the challenge of larger and richer  
904 datasets. *Gigascience* **4**, 7 (2015).
- 905 58. Bulik-Sullivan, B. *et al.* LD Score regression distinguishes confounding from polygenicity  
906 in genome-wide association studies. *Nat. Genet.* **47**, 291–295 (2015).
- 907 59. Barban, N. *et al.* Genome-wide analysis identifies 12 loci influencing human reproductive  
908 behavior. *Nat. Genet.* **48**, 1462–1472 (2016).

909

## 910 **Acknowledgments**

911 We thank Dr. Aysu Okbay, the SSGAC and COGENT consortiums for sharing their summary  
912 statistics for GWAS of educational attainment and cognitive performance excluding specific  
913 cohorts. PAD is supported by the grant 531003014 from The Netherlands Organisation for  
914 Health Research and Development (ZonMW). RC is supported by an ESRC studentship. AA is  
915 supported by the Foundation Volksbond Rotterdam and by ZonMw grant 849200011 from The  
916 Netherlands Organisation for Health Research and Development. KR is supported by a Sir Henry  
917 Wellcome Postdoctoral Fellowship. DIB is supported by the Royal Netherlands Academy of  
918 Science (KNAW) Professor Award (PAH/6635). EvB is supported by ZonMW grant 531003014  
919 and VENI grant 451-15-017. MGN is supported by R01MH120219, ZonMW grants 849200011  
920 and 531003014 from The Netherlands Organisation for Health Research and Development, a  
921 VENI grant awarded by NWO (VI.Veni.191G.030) and is a Jacobs Foundation Research Fellow.  
922 This research has been conducted using the UK Biobank Resource under Application Number

923 40310. The Netherlands Twin Register is supported by NWO Groot (480-15-001/674):  
924 Netherlands Twin Register Repository: researching the interplay between genome and  
925 environment and the Avera Institute for Human Genetics, Sioux Falls, South Dakota (USA) for  
926 genotyping. We gratefully acknowledge the research program ‘Consortium on Individual  
927 Development (CID)’ which is funded through the Gravitation program of the Dutch Ministry of  
928 Education, Culture and Science and the Netherlands Organization for Scientific Research (NWO:  
929 0240-001-003). We gratefully acknowledge ‘Open Data Infrastructure for Social Science and  
930 Economic Innovations (ODISSEI) (NWO: NRGWI.obrug.2018.008)’. The authors gratefully  
931 acknowledge the ongoing contribution of the participants in the Twins Early Development Study  
932 (TEDS) and their families. TEDS is supported by a programme grant to Thalia Eley from the UK  
933 Medical Research Council (MR/V012878/1 and previously to Robert Plomin MR/M021475/1  
934 and G0901245), with additional support from the US National Institutes of Health (AG046938).  
935 The funders had no role in study design, data collection and analysis, decision to publish or  
936 preparation of the manuscript.

## 937 **Author Contributions**

938 RC & PAD conceived and designed the study, with helpful contributions from MGN. PAD &  
939 RC analysed the data, with help from JJH to obtain polygenic score weights and AA to perform  
940 GWAS in UK Biobank. PAD, MGN, RC, and EME performed the simulation study. RC & PAD  
941 wrote the manuscript. JJH, AA, EME, MM, BWD, ELdZ, KR, TCE, DIB, EvB, and GB  
942 contributed to the interpretation of data, provided feedback on manuscript drafts and approved  
943 the final draft.

## 944 **Competing Interests**

945 The authors declare no competing interests.
